# Supplementary material for: Effects of semicore electrons on stopping power in helium-irradiated aluminum nanosheets
Source: Royal Society of Chemistry journal article supplement (doi:10.1039/d3cp01506h), 2023-01-01
Supplement: d3cp01506h1.pdf [file d3cp01506h1.pdf]

## Supplementary material: Effects of core electrons on stopping power in helium-irradiated aluminum nanosheet

Su-Na Pang,<sup>1</sup> Feng Wang,<sup>1,\*</sup> Ya-Ting Sun,<sup>1</sup> Fei Mao,<sup>2,†</sup> and Cong-Zhang Gao<sup>3,‡</sup>

<sup>1</sup>Beijing Institute of Technology, Beijing 100081, China

<sup>2</sup>School of Nuclear Science and Technology, University of South China, Hengyang 421001, China

<sup>3</sup>Institute of Applied Physics and Computational Mathematics, Beijing 100094, China

(Dated: March 31, 2023)

In this supplementary material, we present the stopping power curve calculated using simulation cell sizes of  $2 \times 2 \times 2$ ,  $3 \times 3 \times 3$  and  $4 \times 4 \times 4$  and the ratio of kinetic energy of target atom ( $E_{KT}$ ) to kinetic energy of projectile ( $E_{KP}$ ) during collision under channeling and off-channeling condition.

### A. The impact of simulation cell size

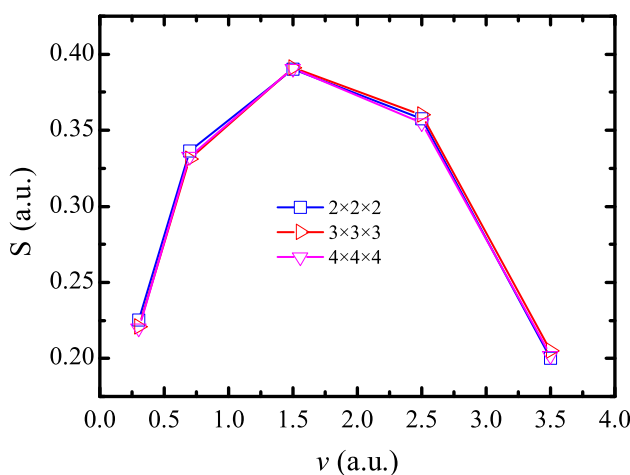

FIG. 1. The stopping power curve calculated using simulation cell sizes of  $2 \times 2 \times 2$ ,  $3 \times 3 \times 3$  and  $4 \times 4 \times 4$ . The valence electrons configurations of Al pseudopotential is  $3s^23p^1$ . For all simulations, the projectile is incident along the channeling trajectory.

The structure of Al film we investigated is  $2 \times 2 \times 2$  supercell, consisting of 32 Al atoms. This simulation was compared to a larger simulation cell with 108 Al atoms ( $3 \times 3 \times 3$ ) and 256 Al atoms ( $4 \times 4 \times 4$ ). The cubic lattice parameter is 4.039 Å.

Fig. 1 shows the stopping power curves calculated using different size simulation cell of  $2 \times 2 \times 2$ ,  $3 \times 3 \times 3$  and  $4 \times 4 \times 4$ . The results show that no appreciable finite size errors were found. The supercell size is chosen to meet the computational requirements of cost control while minimizing the impact of grain size on the research.

### B. The role of nuclear stopping

Fig. 2 shows the ratio of kinetic energy of target atom ( $E_{KT}$ ) to the kinetic energy lost by the projectile ( $\Delta E_{KP}$ ) during collision under channeling condition. Fig. 3 shows that the Ratio of kinetic energy of target atom ( $E_{KT}$ ) to the kinetic energy lost by the projectile ( $\Delta E_{KP}$ ) during collision under off-channeling condition. In the velocity range of our study, when the velocity is 0.1 a.u., the ratio can reach 2.6 % at the highest. As the velocity increases, the ratio decreases rapidly. For off-channeling trajectories, the ratio of the  $E_{KT}$  to the  $\Delta E_{KP}$  is given. When the projectile is very close to the target atom, the ratio increases. But during the whole collision process, the target kinetic energy is very small.

The nuclear motion is allowed in our simulation, including the nuclear stopping effect. However, the kinetic energy of the target atom during the whole collision process is so small that the  $S_n$  is negligible.

\* wangfeng01@tsinghua.org.cn

† maofei@mail.bnu.edu.cn

‡ czgao88@hotmail.com

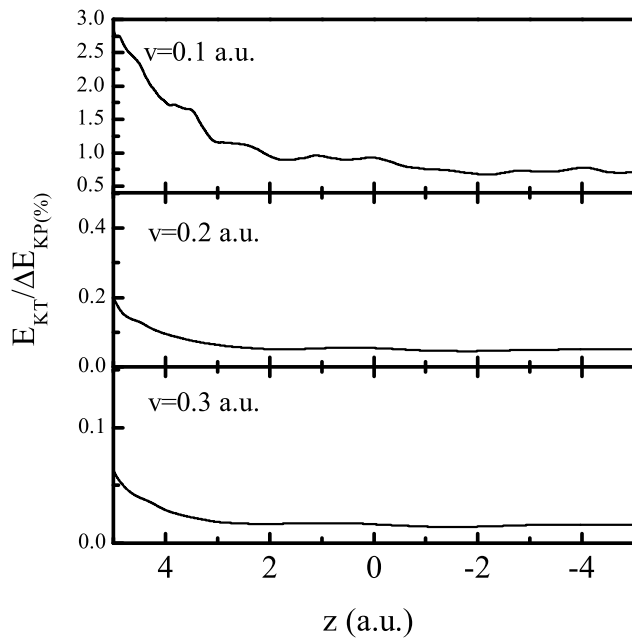

FIG. 2. Ratio of the kinetic energy of the target atom ( $E_{KT}$ ) to the kinetic energy lost by the projectile ( $\Delta E_{KP}$ ) during collision as a function of the projectile position for channeling trajectory.

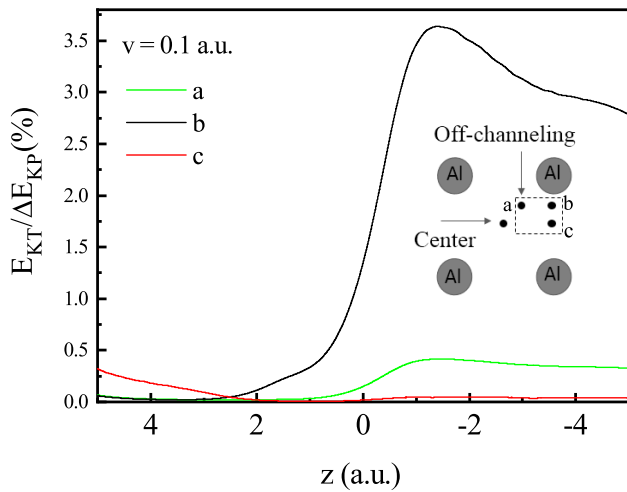

FIG. 3. Ratio of the kinetic energy of the target atom ( $E_{KT}$ ) to the kinetic energy lost by the projectile ( $\Delta E_{KP}$ ) during collision as a function of the projectile position for off-channeling trajectory.
